# Supplementary material for: Ectopic expression of the transcription factor CUC2 restricts growth by cell cycle inhibition in Arabidopsis leaves
Source: PubMed Central journal article supplement — Plant Signal Behav. 2020 Jan 3;15(1):1706024. doi: 10.1080/15592324.2019.1706024 (PMC7012148; doi:10.1080/15592324.2019.1706024), 2020-01-03
Supplement: kpsb-15-01-1706024-s001.pdf [file kpsb-15-01-1706024-s001.pdf]

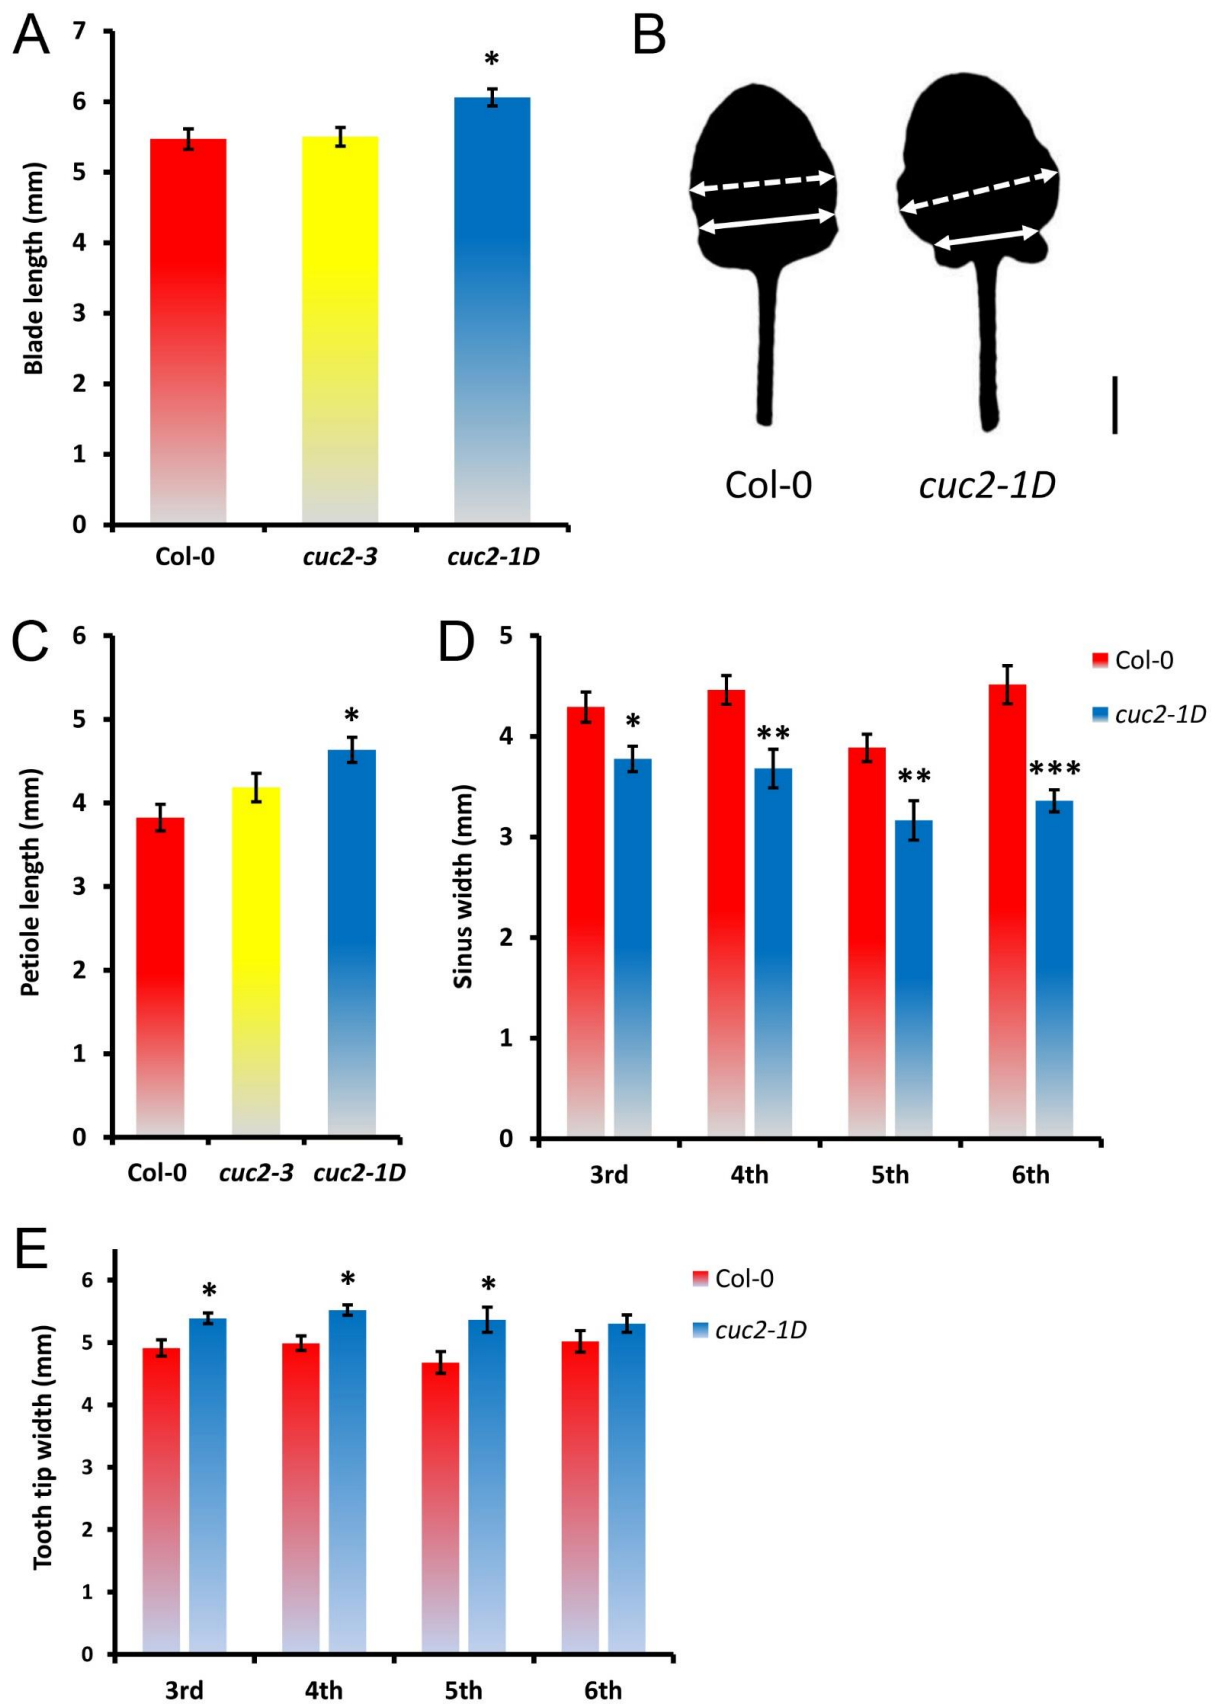

Figure S1

**Figure S1** Contrary effects on growth in different areas of *cuc2-1D* rosette leaves. Fourth rosette leaves of Col-0, *cuc2-3* and *cuc2-1D* plants, 36 DAG. A, leaf blade length,  $N = 10, \pm$  SE. B, Silhouette of rosette leaf with line of measurement: Tooth sinus width (white line) and tooth tip width (of 1<sup>st</sup> teeth, dotted line), scale bar = 2 mm. C, Petiole length,  $N = 10, \pm$  SE. D-E, Tooth sinus width (D) and tooth tip width (E) of Col-0 and *cuc2-1D*,  $N = 10, \pm$  SE. Asterisks indicate significant differences to Col-0 (Student's t test: \*,  $P < 0.05$ ; \*\*,  $P < 0.01$ ; \*\*\*,  $P < 0.001$ ) compared with the controls.

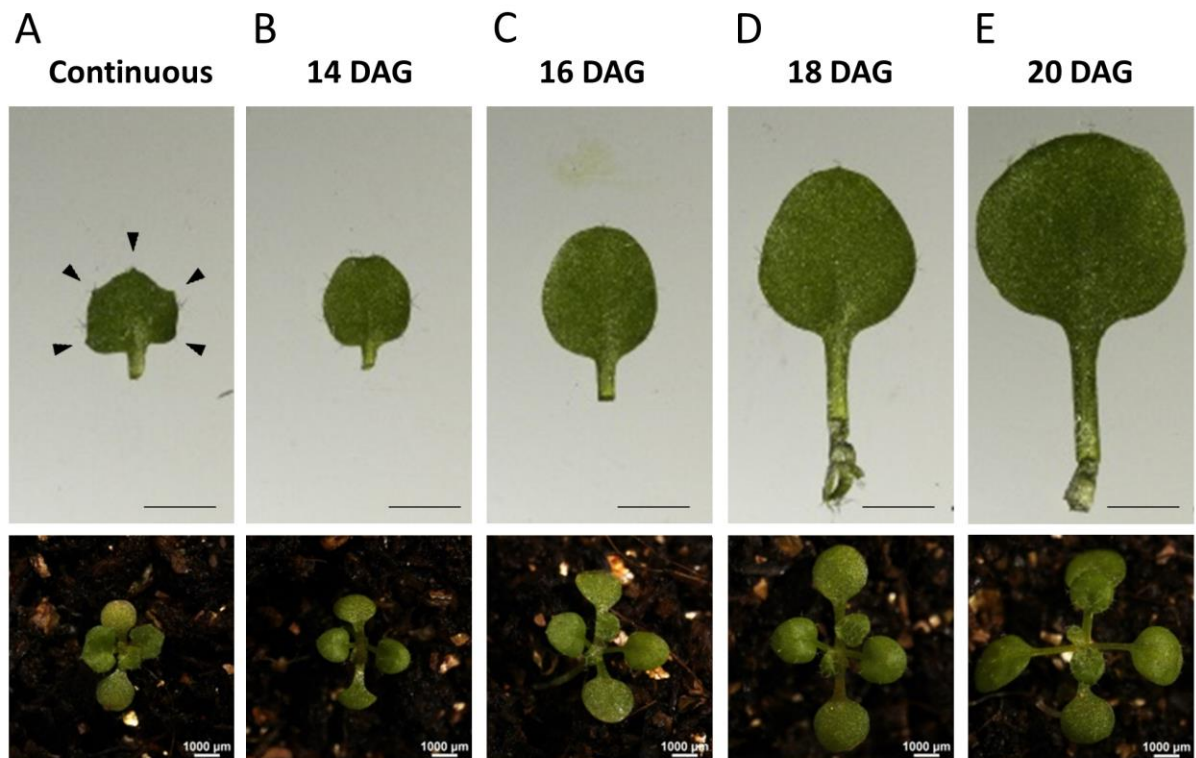

**Figure S2** Effects of continuous induction of *CUC2-GR* on primary leaves (upper panel) and the leaf rosette (lower panel), 20 DAG. The DEX treatment started 0 DAG (A, continuous), 14 DAG (B), 16 DAG (C), 18 DAG (D) or 20 DAG (E). Scale bar = 2 mm in (A), Scale bar=1000  $\mu$ m in (F).

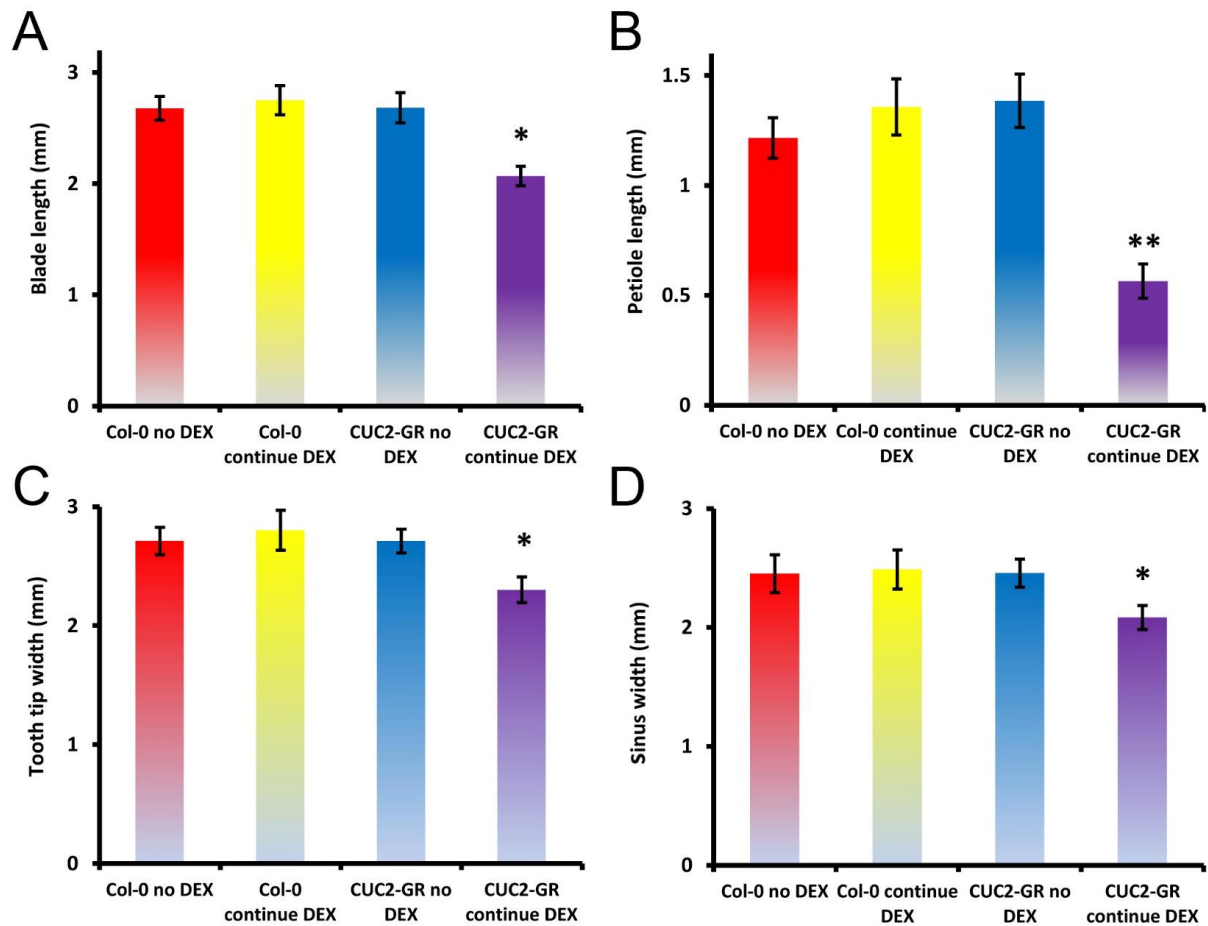

**Figure S3** Growth inhibition by continuous induced *CUC2* along the proximo-distal and the medio-lateral axes of the fourth leaf. *Col-0* and *CUC2-GR* plants were either non- or DEX-treated (22 DAG, N = 10,  $\pm$  SE). A, Blade length. B, Petiole length. C, (1st) tooth tip width. D, Sinus width. Asterisks indicate significant differences to non-treated *CUC2-GR* (Student's t test: \*,  $P < 0.05$ ; \*\*,  $P < 0.01$ ).

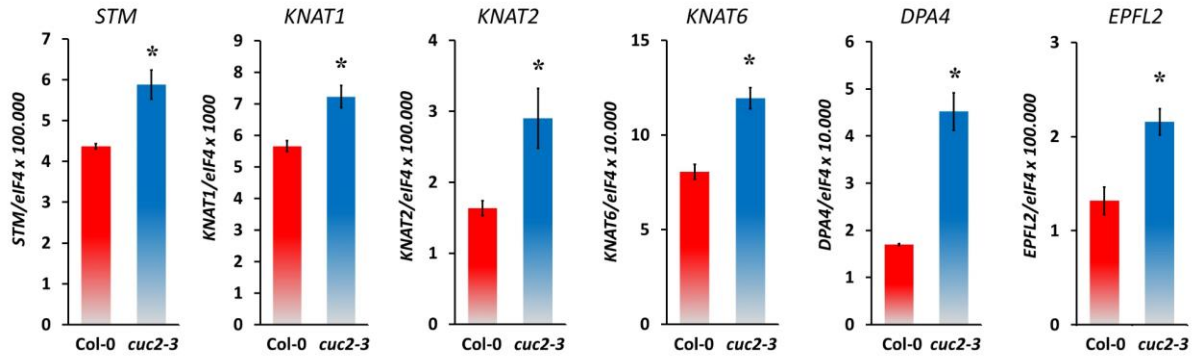

**Figure S4** Misexpression of genes in *cuc2-3* mutant leaves. qRT-PCR with Col-0 and *cuc2-3* leaves, 29 DAG, N = 3,  $\pm$  SE. Asterisks indicate significant change of expression (Student's t test: \*,  $P < 0.05$ ) compared with Col-0 plants.

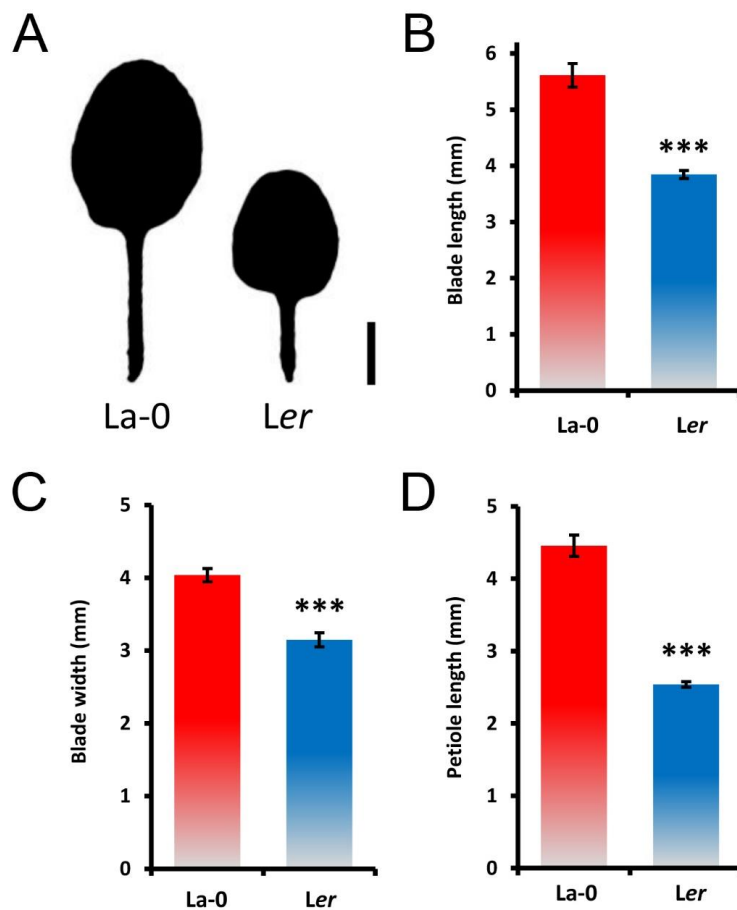

**Figure S5** Growth inhibition by loss of the receptor kinase ER, 30 DAG, N = 10,  $\pm$  SE. A, Fourth leaf phenotype of La-0 and *Ler*; scale bar = 2 mm. B, Blade length. C, Blade width. D, Petiole length.

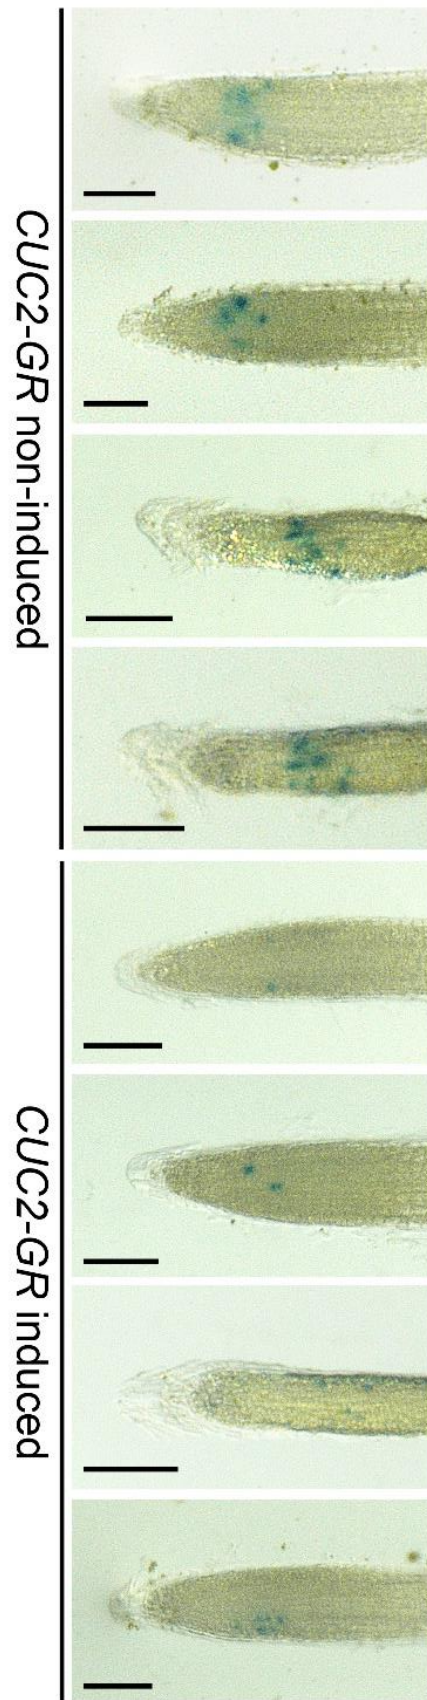

**Figure S6** Induction of *CUC2-GR* reduces *CYCB1;1::GUS* expression in roots. Before GUS staining, F1 seedlings of the crossing *CUC2-GR* ♀ x *CYCB1;1::GUS* ♂ were grown with and without 10  $\mu$ M DEX, 8 DAG.
